# Supplementary material for: High-quality draft genome sequences of Pseudomonas monteilii DSM 14164T, Pseudomonas mosselii DSM 17497T, Pseudomonas plecoglossicida DSM 15088T, Pseudomonas taiwanensis DSM 21245T and Pseudomonas vranovensis DSM 16006T: taxonomic considerations
Source: PubMed Central journal article supplement (PMC7491935; doi:10.1099/acmi.0.000067), 2019-10-29
Supplement: acmi-1-067-s001.pdf [file acmi-1-067-s001.pdf]

## Supplementary material

**Table S1.** Strains included in the study, genome characteristics, accession numbers of their genomes and groupings in the ANIb and GGDC analyses.

**Table S2.** Major protein profiles of *P. monteilii* DSM 14164<sup>T</sup>, *P. mosselii* DSM 17497<sup>T</sup>, *P. plecoglossicida* DSM 15088<sup>T</sup>, *P. taiwanensis* DSM 21245<sup>T</sup> and *P. vranovensis* DSM16006<sup>T</sup> (m/z: mass to charge ratio; + and -: presence or absence of the corresponding protein).

**Figure S1.** Dendrogram based on the comparison with the Biotyper program of the major proteins detected. The profiles of closely related type strains present in the Biotyper database are also included as a control and are labeled with an asterisk. Distances generated are arbitrary.

**Supplementary Table S1.** Strains included in the study, genome characteristics, accession numbers of their genomes and groupings in the ANIb and GGDC analyses. Type strains are indicated in bold.

| Species                            | Strain                         | Genome accession number | Size           | Contigs    | GC [%]      | Genomic Group (ANIb) | Genomic Group (GGDC) |
|------------------------------------|--------------------------------|-------------------------|----------------|------------|-------------|----------------------|----------------------|
| <i>Pseudomonas alkylphenolica</i>  | <b>KL28<sup>T</sup></b>        | <b>CP009048</b>         | <b>5764622</b> | <b>1</b>   | <b>60,6</b> | <b>35</b>            | <b>36</b>            |
| <i>Pseudomonas cremoricolorata</i> | <b>DSM 17059<sup>T</sup></b>   | <b>AUEA01</b>           | <b>4655082</b> | <b>26</b>  | <b>63,5</b> | <b>29</b>            | <b>29</b>            |
| <i>Pseudomonas donghuensis</i>     | <b>HYS<sup>T</sup></b>         | <b>AJJP01</b>           | <b>5639475</b> | <b>231</b> | <b>62,4</b> | 33                   | <b>34</b>            |
| <i>Pseudomonas entomophila</i>     | <b>L48<sup>T</sup></b>         | <b>CT573326</b>         | <b>5888780</b> | <b>1</b>   | <b>64,2</b> | <b>25</b>            | <b>2</b>             |
| <i>Pseudomonas fulva</i>           | <b>NBRC 16637<sup>T</sup></b>  | <b>BBIQ01</b>           | <b>4768229</b> | <b>46</b>  | <b>61,8</b> | <b>6</b>             | <b>27</b>            |
| <i>Pseudomonas fulva</i>           | <b>DSM 17717<sup>T</sup></b>   | <b>JHYU01</b>           | <b>4770636</b> | <b>48</b>  | <b>61,7</b> | <b>6</b>             | <b>27</b>            |
| <i>Pseudomonas guariconensis</i>   | <b>LMG 27394<sup>T</sup></b>   | <b>FMYX01</b>           | <b>5079034</b> | <b>29</b>  | <b>62,6</b> | <b>27</b>            | <b>5</b>             |
| <i>Pseudomonas japonica</i>        | <b>NBRC 103040<sup>T</sup></b> | <b>BBIR01</b>           | <b>6663130</b> | <b>162</b> | <b>64,2</b> | <b>31</b>            | <b>30</b>            |
| <i>Pseudomonas japonica</i>        | <b>DSM22348<sup>T</sup></b>    | <b>2700988710*</b>      | <b>6718608</b> | <b>61</b>  | <b>64,1</b> | <b>31</b>            | <b>30</b>            |
| <i>Pseudomonas monteilii</i>       | <b>DSM 14164<sup>T</sup></b>   | <b>JHYV01</b>           | <b>6308713</b> | <b>85</b>  | <b>61,5</b> | <b>11</b>            | <b>15</b>            |
| <i>Pseudomonas monteilii</i>       | GTC 10897                      | BCAO01                  | 5547282        | 149        | 60,4        | <b>16</b>            | 26                   |
| <i>Pseudomonas monteilii</i>       | GTC 10899                      | BCAP01                  | 5876827        | 112        | 62          | 28                   | 6                    |
| <i>Pseudomonas monteilii</i>       | IOFA19                         | JENF01                  | 5725190        | 126        | 61,3        | 8                    | 23                   |
| <i>Pseudomonas monteilii</i>       | <b>NBRC 103158<sup>T</sup></b> | <b>BBIS01</b>           | <b>6299985</b> | <b>132</b> | <b>61,5</b> | <b>11</b>            | <b>15</b>            |
| <i>Pseudomonas monteilii</i>       | SB3078                         | CP006978                | 6000087        | 1          | 62,5        | 12                   | 19                   |
| <i>Pseudomonas monteilii</i>       | SB3101                         | CP006979                | 5945120        | 1          | 62,5        | 12                   | 19                   |
| <i>Pseudomonas mosselii</i>        | <b>DSM 17497<sup>T</sup></b>   | <b>JHYW01</b>           | <b>6260844</b> | <b>55</b>  | <b>64</b>   | <b>23</b>            | <b>3</b>             |
| <i>Pseudomonas oryzihabitans</i>   | <b>NBRC 102199<sup>T</sup></b> | <b>BBIT01</b>           | <b>5027590</b> | <b>34</b>  | <b>66,2</b> | outgroup             |                      |
| <i>Pseudomonas parafulva</i>       | <b>NBRC 16636<sup>T</sup></b>  | <b>BBIU01</b>           | <b>4954362</b> | <b>55</b>  | <b>62,5</b> | <b>21</b>            | <b>25</b>            |
| <i>Pseudomonas parafulva</i>       | <b>DSM 17004<sup>T</sup></b>   | <b>AUEB01</b>           | <b>4956622</b> | <b>32</b>  | <b>62,4</b> | <b>21</b>            | <b>25</b>            |
| <i>Pseudomonas plecoglossicida</i> | <b>DSM 15088<sup>T</sup></b>   | <b>JHYX01</b>           | <b>5347571</b> | <b>58</b>  | <b>63</b>   | <b>19</b>            | <b>12</b>            |
| <i>Pseudomonas plecoglossicida</i> | <b>NBRC 103162<sup>T</sup></b> | BBIV01                  | 5341796        | 97         | 63          | 19                   | 12                   |
| <i>Pseudomonas putida</i>          | 1A00316                        | 2687453569*             | 5636969        | 43         | 64,5        | 23                   | 3                    |

|                           |              |          |         |      |      |          |    |
|---------------------------|--------------|----------|---------|------|------|----------|----|
| <i>Pseudomonas putida</i> | 791_PPUT     | JUST01   | 6242976 | 576  | 62   | 10       | 17 |
| <i>Pseudomonas putida</i> | A514         | JSVW01   | 6767427 | 49   | 57,7 | 4        | 40 |
| <i>Pseudomonas putida</i> | ABAC63       | LKBN01   | 5139911 | 3451 | 62,3 | 5        | 41 |
| <i>Pseudomonas putida</i> | ABAC8        | LKGZ01   | 5543802 | 66   | 64,4 | 36       | 32 |
| <i>Pseudomonas putida</i> | ATH-43       | LBME01   | 5830220 | 64   | 61   | 17       | 13 |
| <i>Pseudomonas putida</i> | B001         | CAED01   | 5740939 | 262  | 62,2 | 11       | 15 |
| <i>Pseudomonas putida</i> | B6-2         | CP015202 | 6239598 | 27   | 61,6 | 8        | 22 |
| <i>Pseudomonas putida</i> | BIRD-1       | CP002290 | 5731541 | 1    | 61,7 | 8        | 22 |
| <i>Pseudomonas putida</i> | CBB5         | JTEN01   | 6817062 | 146  | 60   | 2        | 39 |
| <i>Pseudomonas putida</i> | CBF10-2      | LUCV01   | 6120625 | 73   | 63,7 | 30       | 31 |
| <i>Pseudomonas putida</i> | CSV86        | AMWJ01   | 6469780 | 209  | 63,1 | 30       | 31 |
| <i>Pseudomonas putida</i> | DLL-E4       | CP007620 | 6484062 | 1    | 62,5 | 12       | 19 |
| <i>Pseudomonas putida</i> | DOT-T1E      | CP003734 | 6260702 | 1    | 61,4 | 8        | 22 |
| <i>Pseudomonas putida</i> | F1           | CP000712 | 5959964 | 1    | 61,9 | 8        | 22 |
| <i>Pseudomonas putida</i> | FDAARGOS_121 | LORX01   | 6958027 | 3    | 66   | outgroup |    |
| <i>Pseudomonas putida</i> | GB-1         | CP000926 | 6078430 | 1    | 61,9 | 9        | 21 |
| <i>Pseudomonas putida</i> | H            | LFYQ01   | 6059900 | 55   | 61,6 | 8        | 22 |
| <i>Pseudomonas putida</i> | H8234        | CP005976 | 6870827 | 1    | 61,6 | 10       | 16 |
| <i>Pseudomonas putida</i> | HB13667      | LKKS01   | 6325504 | 150  | 62,4 | 12       | 19 |
| <i>Pseudomonas putida</i> | HB3267       | CP003738 | 5875750 | 1    | 62,6 | 12       | 19 |
| <i>Pseudomonas putida</i> | HB4184       | LKKT01   | 5930511 | 122  | 61,7 | 11       | 15 |
| <i>Pseudomonas putida</i> | IAC-RBcr5    | LWMA01   | 5760798 | 26   | 62,4 | 9        | 21 |
| <i>Pseudomonas putida</i> | Idaho        | AGFJ01   | 6363067 | 839  | 61,6 | 8        | 22 |
| <i>Pseudomonas putida</i> | INSali382    | LSUZ01   | 6490841 | 246  | 61,6 | 8        | 22 |
| <i>Pseudomonas putida</i> | IOFA1        | LGRH01   | 5708798 | 188  | 61,4 | 8        | 23 |
| <i>Pseudomonas putida</i> | JCM 18452    | BBDB01   | 6284821 | 823  | 62   | 10       | 17 |
| <i>Pseudomonas putida</i> | JCM 18798    | BBDC01   | 6577590 | 924  | 61,6 | 10       | 16 |
| <i>Pseudomonas putida</i> | JCM 9802     | BBDA01   | 6035229 | 472  | 61,7 | 8        | 22 |
| <i>Pseudomonas putida</i> | JLR11        | LDJF01   | 6100369 | 39   | 61,6 | 8        | 22 |
| <i>Pseudomonas putida</i> | JQ581        | LWDW01   | 6563906 | 93   | 62   | 10       | 17 |
| <i>Pseudomonas putida</i> | KB9          | LVHH01   | 5751833 | 106  | 62,2 | 7        | 24 |

|                                  |                               |             |                |          |             |    |    |
|----------------------------------|-------------------------------|-------------|----------------|----------|-------------|----|----|
| <i>Pseudomonas putida</i>        | KF703                         | BBQL01      | 6434897        | 135      | 62,1        | 10 | 17 |
| <i>Pseudomonas putida</i>        | KG-4                          | AYRY01      | 5586914        | 91       | 63          | 12 | 20 |
| <i>Pseudomonas putida</i>        | KT2440                        | AE015451    | 6181863        | 1        | 61,5        | 8  | 22 |
| <i>Pseudomonas putida</i>        | LF54                          | AOUR02      | 5625016        | 180      | 61,3        | 8  | 23 |
| <i>Pseudomonas putida</i>        | LS46                          | ALPV02      | 5874759        | 32       | 61,7        | 8  | 22 |
| <i>Pseudomonas putida</i>        | MC4-5222                      | JOJW01      | 6858096        | 1152     | 59,7        | 1  | 38 |
| <i>Pseudomonas putida</i>        | M02                           | JFBC01      | 6240608        | 1589     | 62          | 12 | 19 |
| <i>Pseudomonas putida</i>        | MR3                           | ARYY01      | 2994716        | 1268     | 60,8        | 26 | 7  |
| <i>Pseudomonas putida</i>        | MT2                           | 2675902956* | 6313443        | 1        | 61,5        | 8  | 22 |
| <i>Pseudomonas putida</i>        | MTCC5279                      | AMZE01      | 5215788        | 171      | 62,5        | 27 | 5  |
| <i>Pseudomonas putida</i>        | N1R                           | 2681812805* | 5729055        | 1        | 62          | 8  | 22 |
| <b><i>Pseudomonas putida</i></b> | <b>NBRC 14164<sup>T</sup></b> | AP013070    | <b>6156701</b> | <b>1</b> | <b>62,3</b> | 10 | 17 |
| <i>Pseudomonas putida</i>        | ND6                           | CP003588    | 6202452        | 2        | 61,7        | 8  | 22 |
| <i>Pseudomonas putida</i>        | NFIX47                        | FMXW01      | 6383414        | 21       | 60,6        | 3  | 37 |
| <i>Pseudomonas putida</i>        | OUS82                         | AZBL01      | 6633308        | 164      | 61,8        | 10 | 16 |
| <i>Pseudomonas putida</i>        | P1                            | MJVE01      | 5140103        | 2899     | 62,2        | 12 | 19 |
| <i>Pseudomonas putida</i>        | PA14H7                        | JBOP01      | 5878755        | 7        | 61,9        | 32 | 33 |
| <i>Pseudomonas putida</i>        | PC9                           | 2521172712* | 5956110        | 2        | 62,6        | 12 | 19 |
| <i>Pseudomonas putida</i>        | PCL1760                       | LIYM01      | 5772078        | 80       | 61,9        | 8  | 22 |
| <i>Pseudomonas putida</i>        | PD1                           | JUHC01      | 5997141        | 37       | 61,8        | 8  | 22 |
| <i>Pseudomonas putida</i>        | PSP1                          | MCBG01      | 5993057        | 64       | 63          | 22 | 1  |
| <i>Pseudomonas putida</i>        | PSP2                          | MCBH01      | 5959848        | 59       | 63          | 22 | 1  |
| <i>Pseudomonas putida</i>        | PSP3                          | MCBI01      | 5996539        | 77       | 63          | 22 | 1  |
| <i>Pseudomonas putida</i>        | PSP4                          | MCBJ01      | 5964102        | 55       | 63          | 22 | 1  |
| <i>Pseudomonas putida</i>        | S11                           | ALXA01      | 5970749        | 196      | 62,4        | 12 | 19 |
| <i>Pseudomonas putida</i>        | S12                           | ALNR01      | 6284656        | 258      | 61,5        | 8  | 22 |
| <i>Pseudomonas putida</i>        | S16                           | CP002870    | 5984790        | 1        | 62,3        | 12 | 19 |
| <i>Pseudomonas putida</i>        | S610                          | AYJQ01      | 4596354        | 69       | 62          | 6  | 28 |
| <i>Pseudomonas putida</i>        | SF1                           | LDPF01      | 5805879        | 292      | 62,5        | 12 | 19 |
| <i>Pseudomonas putida</i>        | SJ3                           | AXDX02      | 5596765        | 279      | 61,6        | 10 | 16 |

|                                |                              |               |                |           |           |           |          |
|--------------------------------|------------------------------|---------------|----------------|-----------|-----------|-----------|----------|
| <i>Pseudomonas putida</i>      | SJTE-1                       | CP015876      | 5551505        | 207       | 62,3      | 8         | 22       |
| <i>Pseudomonas putida</i>      | SQ1                          | JTCJ01        | 5320937        | 1623      | 61,6      | 17        | 13       |
| <i>Pseudomonas putida</i>      | T2-2                         | JALX01        | 5524229        | 389       | 62,6      | 7         | 24       |
| <i>Pseudomonas putida</i>      | TRO1                         | APBQ01        | 6315212        | 222       | 61,4      | 8         | 22       |
| <i>Pseudomonas putida</i>      | UASWS0946                    | JXOG01        | 6001296        | 191       | 63,9      | 36        | 32       |
| <i>Pseudomonas putida</i>      | W15Oct28                     | JENB01        | 6320510        | 119       | 62,8      | 10        | 18       |
| <i>Pseudomonas putida</i>      | W619                         | CP000949      | 5774330        | 1         | 61,4      | 17        | 13       |
| <i>Pseudomonas putida</i>      | YKD221                       | BBNC01        | 5870708        | 91        | 61,9      | 8         | 22       |
| <b><i>Pseudomonas soli</i></b> | <b>LMG 27941<sup>T</sup></b> | <b>FOEQ01</b> | <b>5644909</b> | <b>34</b> | <b>64</b> | <b>24</b> | <b>4</b> |
| <i>Pseudomonas</i> sp.         | GTC 16482                    | BCAS01        | 6764392        | 292       | 61,5      | 8         | 22       |
| <i>Pseudomonas</i> sp.         | LAIL14HWK12_I1               | 2541046952*   | 5665646        | 24        | 62,1      | 11        | 15       |
| <i>Pseudomonas</i> sp.         | LAIL14HWK12_I3               | 2521172669*   | 5666577        | 23        | 62,1      | 11        | 15       |
| <i>Pseudomonas</i> sp.         | LAMO17WK12_I11               | 2521172641*   | 5560711        | 25        | 62,2      | 11        | 15       |
| <i>Pseudomonas</i> sp.         | LAMO17WK12_I12               | 2521172640*   | 5564094        | 27        | 62,2      | 11        | 15       |
| <i>Pseudomonas</i> sp.         | LAMO17WK12_I7                | 2521172645*   | 5564386        | 24        | 62,2      | 11        | 15       |
| <i>Pseudomonas</i> sp.         | LAMO17WK12_I8                | 2521172536*   | 5565480        | 25        | 62,2      | 11        | 15       |
| <i>Pseudomonas</i> sp.         | NBRC 111117                  | BCAT01        | 5532473        | 61        | 64,5      | 36        | 32       |
| <i>Pseudomonas</i> sp.         | NBRC 111118                  | BCAU01        | 6400771        | 206       | 61        | 8         | 22       |
| <i>Pseudomonas</i> sp.         | NBRC 111119                  | BCAV01        | 5415012        | 106       | 62,3      | 21        | 25       |
| <i>Pseudomonas</i> sp.         | NBRC 111121                  | BCAX01        | 6284301        | 131       | 61,5      | 8         | 22       |
| <i>Pseudomonas</i> sp.         | NBRC 111123                  | BCAZ01        | 5672465        | 108       | 62,9      | 13        | 9        |
| <i>Pseudomonas</i> sp.         | NBRC 111124                  | BCBA01        | 6089375        | 109       | 62,4      | 14        | 10       |
| <i>Pseudomonas</i> sp.         | NBRC 111125                  | BCBB01        | 6340580        | 150       | 61,6      | 8         | 22       |
| <i>Pseudomonas</i> sp.         | NBRC 111127                  | BCBD01        | 5785197        | 352       | 62,5      | 7         | 24       |
| <i>Pseudomonas</i> sp.         | NBRC 111128                  | BCBE01        | 5746848        | 197       | 62,2      | 7         | 24       |
| <i>Pseudomonas</i> sp.         | NBRC 111129                  | BCBF01        | 5688102        | 233       | 62,1      | 7         | 24       |
| <i>Pseudomonas</i> sp.         | NBRC 111130                  | BCBG01        | 5718736        | 118       | 62,8      | 15        | 11       |
| <i>Pseudomonas</i> sp.         | NBRC 111131                  | BCBH01        | 6192173        | 106       | 61,8      | 18        | 14       |
| <i>Pseudomonas</i> sp.         | NBRC 111132                  | BCBI01        | 6091541        | 134       | 61,9      | 9         | 21       |
| <i>Pseudomonas</i> sp.         | NBRC 111133                  | BCBJ01        | 6466925        | 188       | 61,4      | 11        | 15       |
| <i>Pseudomonas</i> sp.         | NBRC 111134                  | BCBK01        | 6142670        | 147       | 62        | 10        | 16       |

|                                       |                              |                    |                |           |             |           |           |
|---------------------------------------|------------------------------|--------------------|----------------|-----------|-------------|-----------|-----------|
| <i>Pseudomonas</i> sp.                | NBRC 111136                  | BCBM01             | 6551757        | 202       | 61,5        | 8         | 22        |
| <i>Pseudomonas</i> sp.                | NBRC 111140                  | BCBQ01             | 6303060        | 206       | 62,1        | 9         | 21        |
| <i>Pseudomonas</i> sp.                | NBRC 111142                  | BCBS01             | 6325459        | 329       | 62,8        | 22        | 1         |
| <i>Pseudomonas</i> sp.                | NBRC 111143                  | BCBT01             | 6327194        | 125       | 62,8        | 22        | 1         |
| <i>Pseudomonas</i> sp.                | NBRC 111144                  | BCBU01             | 5429876        | 187       | 62,4        | 7         | 24        |
| <i>Pseudomonas</i> sp.                | P482                         | NZ_JHTS01          | 5623997        | 69        | 62,4        | 33        | 34        |
| <i>Pseudomonas</i> sp.                | RV120224_01c                 | 2545824562*        | 6037951        | 40        | 62,4        | 11        | 15        |
| <i>Pseudomonas</i> sp.                | RV12022401b                  | 2545824563*        | 6042872        | 38        | 62,4        | 11        | 15        |
| <i>Pseudomonas</i> sp.                | URIL14HWK12_I5               | 2518645599*        | 5723734        | 24        | 62,1        | 11        | 15        |
| <i>Pseudomonas</i> sp.                | URIL14HWK12_I8               | 2545555814*        | 5822697        | 27        | 62          | 11        | 15        |
| <b><i>Pseudomonas taiwanensis</i></b> | <b>DSM 21245<sup>T</sup></b> | <b>AUEC01</b>      | <b>5415134</b> | <b>67</b> | <b>61,8</b> | <b>20</b> | <b>8</b>  |
| <i>Pseudomonas taiwanensis</i>        | SJ9                          | AXUP01             | 6253055        | 736       | 61,8        | 12        | 19        |
| <i>Pseudomonas taiwanensis</i>        | VLB120                       | 2558309062*        | 5966222        | 2         | 61,6        | 20        | 8         |
| <b><i>Pseudomonas vranovensis</i></b> | <b>DSM 16006<sup>T</sup></b> | <b>AUED01</b>      | <b>5697807</b> | <b>36</b> | <b>61,5</b> | <b>34</b> | <b>35</b> |
| <b><i>Pseudomonas aeruginosa</i></b>  | <b>DSM 50071<sup>T</sup></b> | <b>NZ_CP012001</b> | <b>6291043</b> | <b>30</b> | <b>66,6</b> | outgroup  |           |

\* Genome accession numbers obtained from the Joint Genome Institute

**Table S2.** Major protein profiles of *P. monteillii* DSM 14164<sup>T</sup>, *P. mossellii* DSM 17497<sup>T</sup>, *P. plecoglossicida* DSM 15088<sup>T</sup>, *P. taiwanensis* DSM 21245<sup>T</sup> and *P. vranovensis* DSM 16006<sup>T</sup> (m/z: mass to charge ratio; + and -: presence or absence of the corresponding protein).

| m/z  | <i>P. vranovensis</i> | <i>P. taiwanensis</i> | <i>P. plecoglossicida</i> | <i>P. mossellii</i> | <i>P. monteillii</i> |
|------|-----------------------|-----------------------|---------------------------|---------------------|----------------------|
| 3011 | -                     | -                     | -                         | -                   | -                    |
| 3031 | +                     | -                     | -                         | -                   | -                    |
| 3299 | -                     | -                     | -                         | +                   | -                    |
| 3319 | -                     | -                     | -                         | -                   | +                    |
| 3327 | +                     | +                     | +                         | -                   | -                    |
| 3350 | -                     | -                     | -                         | -                   | -                    |
| 3587 | +                     | +                     | +                         | +                   | -                    |
| 3608 | +                     | +                     | +                         | +                   | +                    |
| 3649 | -                     | -                     | -                         | -                   | -                    |
| 4120 | -                     | +                     | +                         | +                   | +                    |
| 4128 | +                     | -                     | -                         | -                   | -                    |
| 4435 | +                     | +                     | +                         | -                   | +                    |
| 4449 | -                     | -                     | -                         | +                   | -                    |
| 4496 | -                     | -                     | -                         | -                   | +                    |
| 4551 | +                     | -                     | -                         | -                   | -                    |
| 4558 | -                     | -                     | -                         | -                   | +                    |
| 4809 | -                     | -                     | -                         | +                   | -                    |
| 4819 | +                     | -                     | -                         | -                   | -                    |
| 4829 | +                     | -                     | -                         | -                   | -                    |
| 4906 | +                     | -                     | -                         | -                   | -                    |
| 4950 | -                     | -                     | -                         | +                   | -                    |
| 4955 | +                     | -                     | -                         | -                   | -                    |
| 4957 | -                     | +                     | -                         | -                   | -                    |
| 4962 | -                     | -                     | -                         | +                   | -                    |
| 4969 | -                     | -                     | +                         | -                   | +                    |
| 4977 | -                     | +                     | -                         | -                   | -                    |
| 5096 | -                     | +                     | -                         | -                   | -                    |
| 5106 | +                     | -                     | +                         | +                   | +                    |
| 5117 | -                     | +                     | -                         | -                   | -                    |
| 5122 | -                     | -                     | -                         | -                   | +                    |
| 5124 | +                     | +                     | +                         | -                   | -                    |
| 5139 | -                     | +                     | +                         | +                   | +                    |
| 5153 | -                     | +                     | +                         | -                   | -                    |
| 5167 | -                     | +                     | -                         | -                   | -                    |
| 5188 | -                     | -                     | -                         | -                   | -                    |
| 5202 | -                     | -                     | -                         | -                   | +                    |
| 5264 | -                     | -                     | -                         | -                   | +                    |
| 5645 | -                     | +                     | -                         | -                   | -                    |
| 5990 | -                     | +                     | +                         | +                   | +                    |
| 6023 | -                     | -                     | -                         | -                   | -                    |
| 6054 | -                     | -                     | -                         | -                   | +                    |
| 6060 | +                     | -                     | -                         | -                   | -                    |
| 6086 | -                     | -                     | -                         | -                   | -                    |
| 6307 | -                     | -                     | -                         | +                   | -                    |
| 6321 | +                     | -                     | -                         | -                   | +                    |
| 6335 | -                     | +                     | -                         | -                   | -                    |
| 6595 | -                     | -                     | -                         | +                   | -                    |
| 6638 | +                     | -                     | -                         | -                   | +                    |
| 6653 | +                     | +                     | +                         | -                   | -                    |
| 6699 | -                     | -                     | -                         | -                   | -                    |
| 6702 | -                     | -                     | -                         | -                   | +                    |
| 7173 | +                     | +                     | +                         | +                   | +                    |
| 7213 | +                     | +                     | +                         | +                   | +                    |
| 7234 | -                     | -                     | -                         | -                   | +                    |
| 7277 | -                     | -                     | -                         | -                   | +                    |
| 7581 | +                     | -                     | -                         | -                   | +                    |
| 7606 | -                     | +                     | -                         | -                   | -                    |
| 7621 | -                     | -                     | -                         | -                   | +                    |
| 7853 | -                     | -                     | -                         | -                   | -                    |

|       |   |   |   |   |   |
|-------|---|---|---|---|---|
| 8240  |   | + | + | + | + |
| 8256  | + | - | - | - | - |
| 9102  | + | - | - | - | - |
| 9815  | + | - | - | - | - |
| 9912  | + | - | - | - | - |
| 9939  | - | - | - | - | + |
| 9957  | - | + | - | - | - |
| 10207 | + | - | - | - | - |



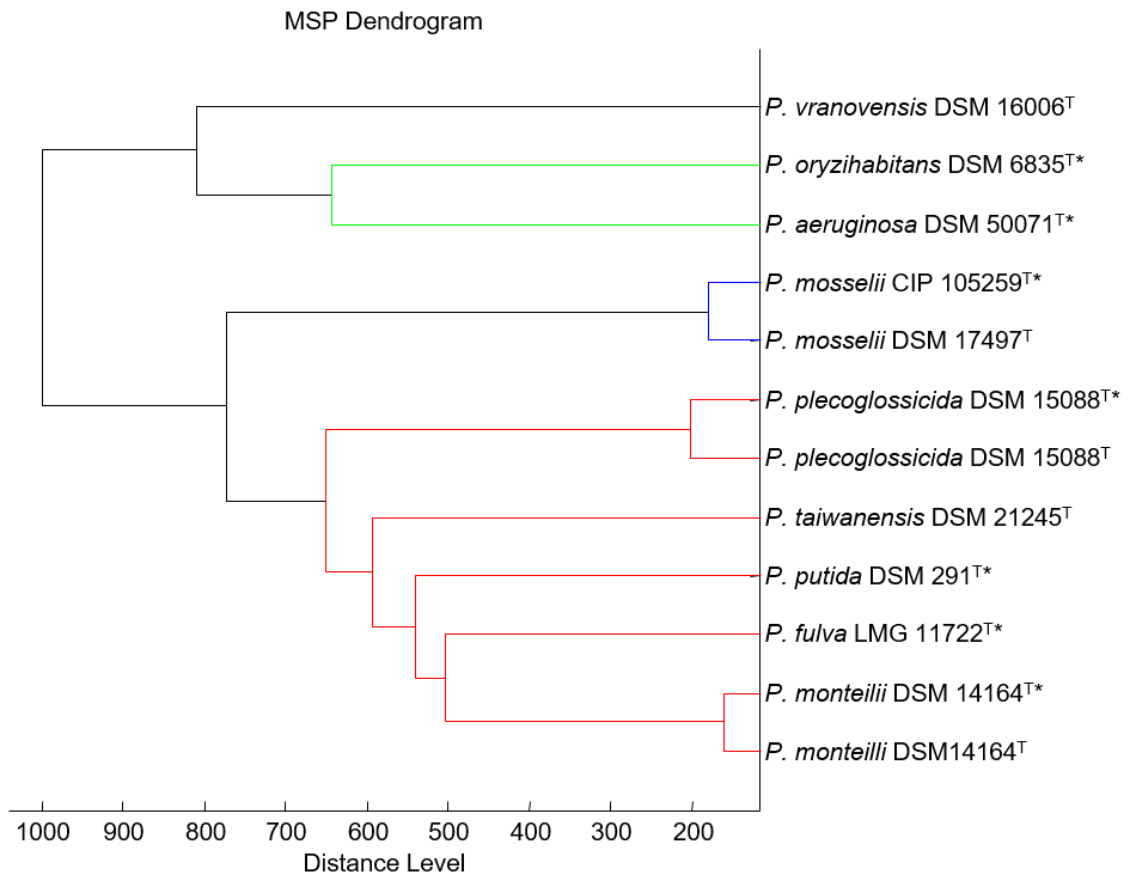

**Figure S1.** Dendrogram based on the comparison with the Biotyper program of the major proteins detected. The profiles of closely related type strains present in the Biotyper database are also included as a control and are labeled with an asterisk. Distances generated are arbitrary.
